# Supplementary material
Source: PubMed Central journal article supplement (PMC3242653)
Supplement: mt2011143x1.pdf [file mt2011143x1.pdf]

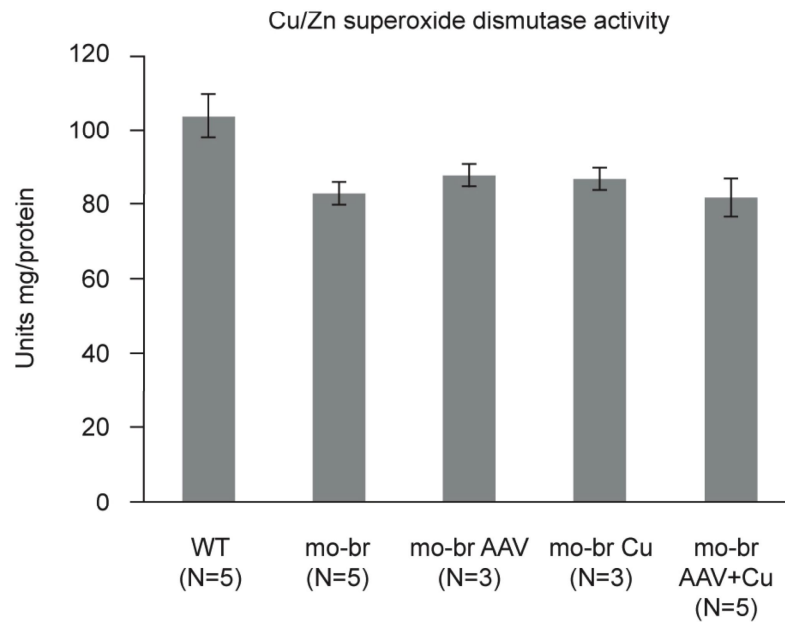

**Supplementary Figure 1.** Brain Cu/Zn superoxide dismutase (SOD1) activity at 12d of age, by treatment category. Even without treatment, the level of SOD1 deficiency in *mo-br* mice is not nearly as profound as for dopamine-beta-hydroxylase or cytochrome c oxidase activities. SOD1 response did not differ notably by treatment group. SOD1 is a cytosolic Cu enzyme, whereas dopamine-beta-hydroxylase and cytochrome c oxidase receive copper in the *trans*-Golgi network and mitochondria, respectively.
